# Supplementary material
Source: publisher site journal article supplement (https://www.dovepress.com/article/450781)
Supplement: Supplementary file 1 [file get_supplementary_file.php]

**Supplemental**

**Supplemental Material 1:** *Weekly Didactics: Lecture Topics, Student Activities, and Guest Lectures*

**Week 1** didactics consisted of a student-led lecture which began by introducing students to the spiral model of biodesign (1). This approach is rooted in bedside-to-bench-to-bedside innovation, rather than bench-to-bedside innovation. The spiral model allows for the incremental assessment of risk within the clinical, commercial, technical, and organization/strategic aspects of a potential project. Students were encouraged to question convention, and to consider all aspects of the project before investing considerable effort into one piece of it (for example, considering commercial viability before extensive technical development). Students were then introduced to ethnography in health care settings, learning about who to talk to, how to interact with providers without impeding clinical workflow, what to observe, as well as observational, note-taking, and interviewing techniques. There were three student activities during week one didactics, including: note-taking of a simulation COVID-19 intubation, a small-group open-ended questions activity, and an activity in student pairs practicing an “elevator pitch” with which to open interviews of health care workers.

**Week 2** consisted of a student-led lecture which introduced students to mind-mapping and need statement formulation. Mind mapping is a common technique used to organize thoughts and observations; the idea to utilize this technique in the context of medical innovation was drawn from the JH CBID approach. Students were taught how to transfer notebook observations onto mind maps and subsequently perform root-cause-analysis to extract unmet clinical needs. Insight discovery from observation to problem to need was reviewed, including a strategy for formulating solution-agnostic and appropriately specific need statements. There were five student activities during week two didactics, including: a small-group clinical immersion reflection, two small-group root-cause-analysis activities, creating a mind map individually based on the previous week’s clinical immersion notes, and writing an associated need statement. Week two didactics concluded with a guest lecture from a UCLA cardiologist who presented a real-world clinical case study of needs finding and need statement formation related to mitral valve repair in surgically ineligible patients.

**Week 3** didactics consisted of a student-led lecture which began by introducing students to needs validation through follow-up stakeholder interviews and use of tools such as importance and satisfaction surveying. Students were then taught about iterative and quantitative methods for needs prioritization. A portion of the lecture was dedicated to market analysis, as it is an unfamiliar topic to most medical students. Market analysis subtopics included market segmentation, market sizing, and market dynamics. Finally, need risk assessment, including nature of the outcome, superseding needs, and blue-sky vs. incremental needs was covered. There were two student activities during week three didactics, including: a small-group clinical immersion reflection and a small-group session brainstorming various needs prioritization criteria. Week three didactics concluded with a guest lecture from a UCLA urologist covering a real-world clinical case-study demonstrating the full needs prioritization process from start to finish.

**Week 4** didactics consisted of a faculty-led interactive case-based session focused on quality improvement. The depth and breadth of medical errors, understanding root cause analysis, and learning to identify opportunities for improvement were demonstrated through real-world cases. Lecture and activities demonstrated how a single patient safety event can highlight the foibles within our medical system and provides us with a rich opportunity for needs finding, innovation, and improvement. This session explored how equipment, human psychology, and environment can all underlie patient safety events. Specific lecture topics included the Swiss cheese model, near misses, active and latent errors, and fishbone for RCA. Emphasis was placed on performing objective RCA when an error occurs rather than placing blame indiscriminately on those involved.

**Week 5** didactics consisted of a student-led lecture beginning with value proposition formation and the relationship of value propositions to need statements. The idea that in health care, there are often multiple customers per product and a value proposition must be formed for each customer was illustrated with real-world examples. The remainder of the lecture covered methods for solution concept generation, including genealogy mapping for innovation target identification, brainstorming using the IDEO method (2), and mutually exclusive / collectively exhaustive (MECE) mapping. There were two student activities in week five didactics, including a small-group genealogy mapping exercise and a small-group brainstorming activity. Week five didactics concluded with a guest lecture from a UCLA medical oncologist demonstrating a real-world implementation of solution concept generation techniques to improve clinical trial awareness among physicians.

**Week 6** didactics began with a lecture covering solution concept selection, with subtopics including commercial considerations and prototyping. Commercial consideration lecture topics covered were intellectual property including patentability and freedom-to-operate, key FDA regulatory pathways and device classifications, and how products and services in healthcare are reimbursed. Secondly, prototyping was outlined as a technique for solution concept selection. Prototyping concepts included types of prototypes, user and design requirements, must-haves and nice-to-haves, and failure modes and effects analysis (FMEA). Week six didactic ended with a one-hour guest lecture by an entrepreneur and angel investor focused on the entrepreneurial process in the medical technology startup space.

**Week 7**: By week seven, students had flowed along with the process of needs discovery and refinement taught during didactics and each arrived at a top unmet clinical need. Students each pitched their top need for ten minutes to an audience of clinical faculty, course instructors, and peers. Pitches were followed by five minutes of questions and open discussion.

References

1. Yazdi Y, Acharya S. A new model for graduate education and innovation in medical technology. Ann Biomed Eng. 2013 Sep;41(9):1822–33.

2. 7 Simple Rules of Brainstorming – IDEO U [Internet]. [cited 2022 Dec 26]. Available from: https://www.ideou.com/blogs/inspiration/7-simple-rules-of-brainstorming
